# Supplementary material for: In vivo calibration of esophageal pressure in the mechanically ventilated patient makes measurements reliable
Source: PubMed Central journal article supplement (PMC4827205; doi:10.1186/s13054-016-1278-5), 2016-04-11
Supplement: 13054_2016_1278_MOESM1_ESM.pdf [file 13054_2016_1278_MOESM1_ESM.pdf]

# ***In vivo* calibration of esophageal pressure in the mechanically ventilated patient makes measurements reliable – Supplementary material**

Mojoli F <sup>1,2</sup>, Iotti GA <sup>1</sup>, Torriglia F <sup>2</sup>, Pozzi M <sup>1</sup>, Volta CA <sup>3</sup>, Bianzina S <sup>2</sup>, Braschi A <sup>1,2</sup>, Brochard L <sup>4,5</sup>

<sup>1</sup> Anesthesia and Intensive Care, Emergency Department, Fondazione IRCCS Policlinico S. Matteo, Pavia, Italy

<sup>2</sup> Anesthesia, Intensive Care and Pain Therapy, Department of Clinical, Surgical, Diagnostic and Pediatric Sciences, University of Pavia, Pavia, Italy

<sup>3</sup> Anesthesia and Intensive Care, Department of Morphology, Surgery and Experimental Medicine, University of Ferrara, Arcispedale Sant'Anna, Ferrara, Italy

<sup>4</sup> Keenan Research Centre, Li Ka Shing Knowledge Institute, St. Michael's Hospital, Toronto, Ontario, Canada

<sup>5</sup> Interdepartmental Division of Critical Care Medicine, University of Toronto, Toronto, Ontario, Canada.



**Figure S1. *In vitro* and *in vivo* Pressure-Volume curves of the esophageal balloon.**

Within the intermediate linear section of the esophageal balloon PV curve, Pes is stable when the balloon is inflated *in vitro* (dotted line), whereas Pes linearly increases with the increase of the filling volume *in vivo* (open circles) due to esophageal elastance ( $E_{es}$ ). When pressure generated by the esophageal wall is subtracted from Pes (Pes-Pew; closed circles), *in vitro* and *in vivo* curves closely parallel each other.

Dotted line: *in vitro* PV curve obtained by progressive inflation of the balloon while the surrounding pressure was maintained at 10 cmH<sub>2</sub>O. Open circles: end-expiratory PV curve obtained in a patient under controlled mechanical ventilation with high positive end-expiratory pressure (15 cmH<sub>2</sub>O). Closed circles: end-expiratory PV curve obtained by subtraction of Pew from raw Pes values in the same patient.



**Figure S2. Average end-expiratory and end-inspiratory esophageal balloon pressure-volume curves in acute respiratory failure patients.**

Open circles: end-expiratory static Pes values ( $Pes_{EE}$ ); open squares: end-inspiratory static Pes values ( $Pes_{EI}$ ). Vertical lines refer to standard deviation of Pes. Horizontal lines refer to standard deviation of specific filling volumes detected on the esophageal balloon pressure-volume curves ( $V_{MIN}$ ,  $V_{BEST}$  and  $V_{MAX}$ ).

$V_{0.5}$  was lower than  $V_{MIN}$ , i.e. it was associated to balloon underfilling at end-expiration, in 42 cases (84%);

$V_{0.5}$  was lower than  $V_{BEST}$ , i.e. it was associated to suboptimal  $\Delta Pes$  in 47 cases (94%).  $V_{MIN}$  was lower than

$V_{BEST}$  in 37 cases (74%), being the  $V_{BEST} - V_{MIN}$  difference  $2.0 \pm 1.7$  ml.



**Figure S3. End-expiratory static esophageal balloon pressure-volume curves at different PEEP levels.**

In panel A, raw Pes values are presented; in panel B, the pressure generated by the esophageal wall (Pew) is subtracted from Pes value. Circles: ZEEP; squares: PEEP 5 cmH<sub>2</sub>O; triangles: PEEP 15 cmH<sub>2</sub>O. Closed symbols refer to V<sub>BEST</sub>, i.e. the balloon filling volume corresponding to the largest respiratory  $\Delta$ Pes (not displayed in figure).

In the same patient, at increasing level of PEEP, a progressively larger balloon filling volume is needed to optimize respiratory  $\Delta$ Pes. Optimal filling volume (V<sub>BEST</sub>) stimulates a variable esophageal pressure reaction, confounding Pes measurement. For example, by filling the esophageal balloon with 5 ml, corresponding to V<sub>BEST</sub> at PEEP 15 cmH<sub>2</sub>O, raw Pes values at the three PEEP levels are very similar (panel A). Once the pressure generated by the esophageal wall is subtracted from Pes values, the PEEP-induced increase of the pressure surrounding the esophagus becomes clearly detectable (Panel B).



**Figure S4. Pes measured with traditional low filling volume ( $V_{0.5}$ ) or with manufacturer's recommended filling volume ( $V_{4.0}$ ) compared to calibrated Pes.**

Panel A. Compared to calibrated Pes, bias and precision ( $\pm 1.96$  SD) of Pes<sub>V0.5</sub> were  $-4.1 \pm 5.5$  cmH<sub>2</sub>O. The Pes<sub>0.5</sub> - Pes<sub>CAL</sub> difference inversely correlated with the Pes<sub>0.5</sub> - Pes<sub>CAL</sub> mean value ( $R = -0.694$ ,  $p < 0.0001$ ): the higher the Pes value, the higher the Pes underestimation due to balloon underfilling.

Panel B. Compared to calibrated Pes, bias and precision ( $\pm 1.96$  SD) of Pes<sub>V4.0</sub> were  $-2.9 \pm 3.3$  cmH<sub>2</sub>O. The Pes<sub>4.0</sub> - Pes<sub>CAL</sub> difference inversely correlated with the Pes<sub>4.0</sub> - Pes<sub>CAL</sub> mean value ( $R = -0.470$ ,  $p < 0.0001$ ): the lower the Pes value, the higher the Pes overestimation due to the esophageal reaction to balloon inflation at 4 ml.
